# Supplementary material
Source: publisher figshare collection journal article supplement (https://acs.figshare.com/ndownloader/files/28413228)
Supplement: Supplementary file 1 [file 28413228]

## SUPPORTING INFORMATION

### **(Macro)Molecular Imprinting of proteins on PCL electrospun scaffolds**

**Victor Perez-Puyana<sup>1</sup>, Paul Wieringa<sup>2</sup>, Antonio Guerrero<sup>1</sup>, Alberto Romero<sup>1</sup>,  
Lorenzo Moroni<sup>2,\*</sup>**

*<sup>1</sup>Departamento de Ingeniería Química, Universidad de Sevilla, Facultad de Química, Escuela Politécnica Superior, 41012 Sevilla, Spain.*

*<sup>2</sup>Department of Complex Tissue Regeneration, MERLN Institute for Technology-Inspired Regenerative Medicine, Maastricht University, 6200 MD Maastricht, The Netherlands*

---

**\*CORRESPONDING AUTHOR**

E-mail: l.moroni@maastrichtuniversity.nl

## Figures

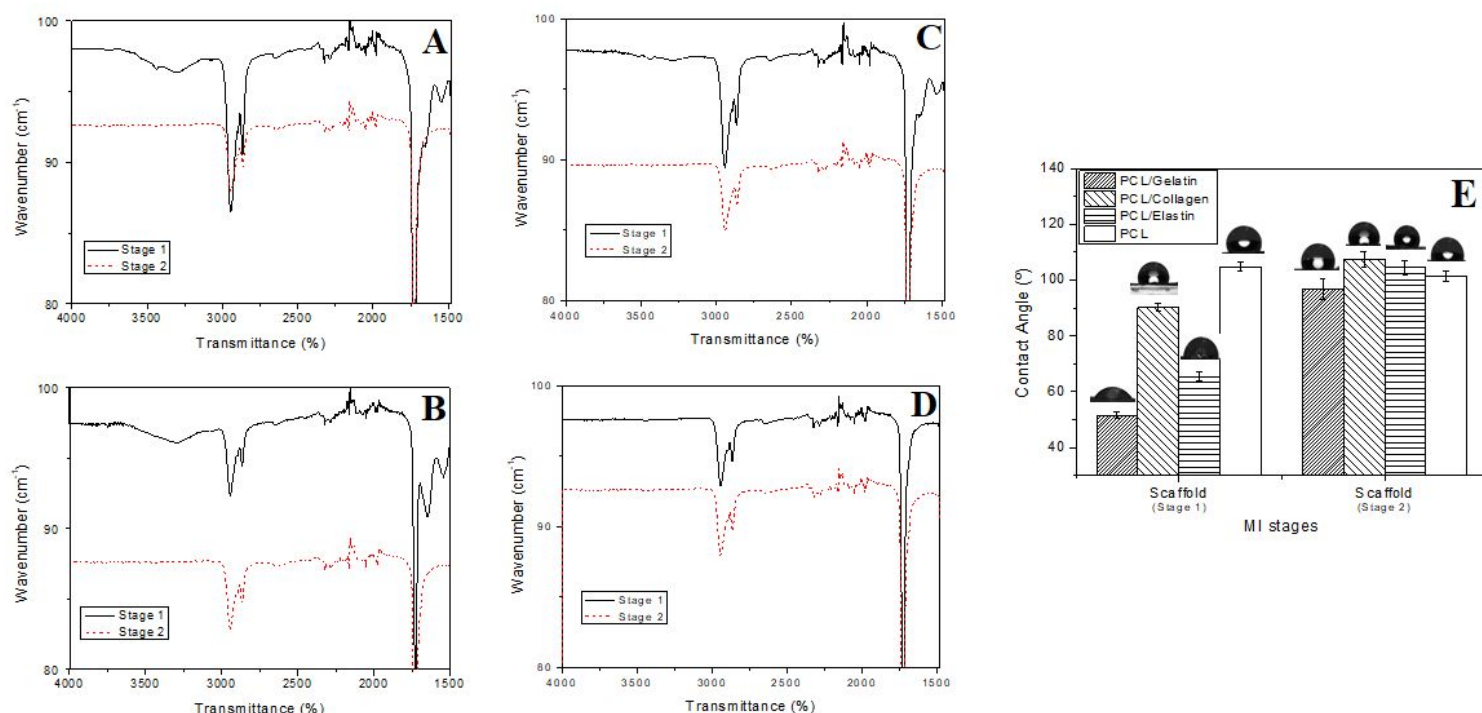

**Fig. S1.** FTIR profiles of (A) PCL-Gelatin, (B) PCL-Collagen, (C) PCL-Elastin and (D) PCL systems obtained *via* electrospinning (Stage 1) and after the solvent extraction stage (Stage 2). (E) Water contact angle (WCA) measurements obtained for each system (PCL-Gelatin, PCL-Collagen, PCL-Elastin and PCL) obtained *via* electrospinning (Stage 1) and after the solvent extraction stage (Stage 2). Images of the drops during the WCA measurements have also been included.

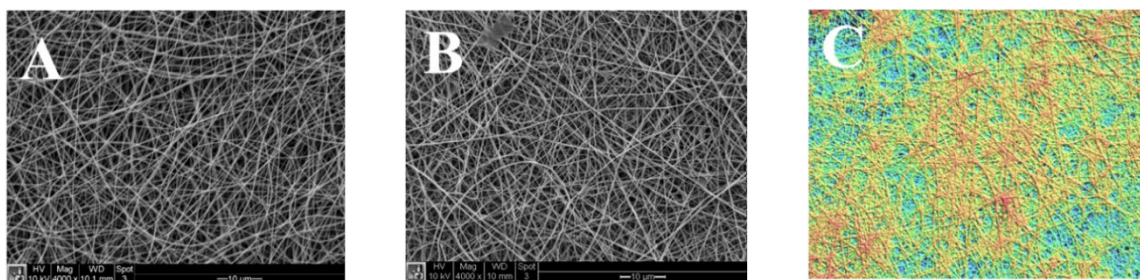

| ROUGHNESS   | Sa ( $\mu\text{m}$ ) | Sq ( $\mu\text{m}$ ) | Sz/Sa            |
|-------------|----------------------|----------------------|------------------|
| PCL/Gelatin | $0.63 \pm 0.14$      | $0.80 \pm 0.10$      | $11.95 \pm 2.18$ |

**Fig. S2.** SEM images (A) before and (B) after solvent extraction of the PCL-Gelatin system. (C) A topographical image and different roughness parameters ( $S_a$ ,  $S_q$  and  $S_z/S_a$  ratio) for the PCL/Gelatin system were also included.

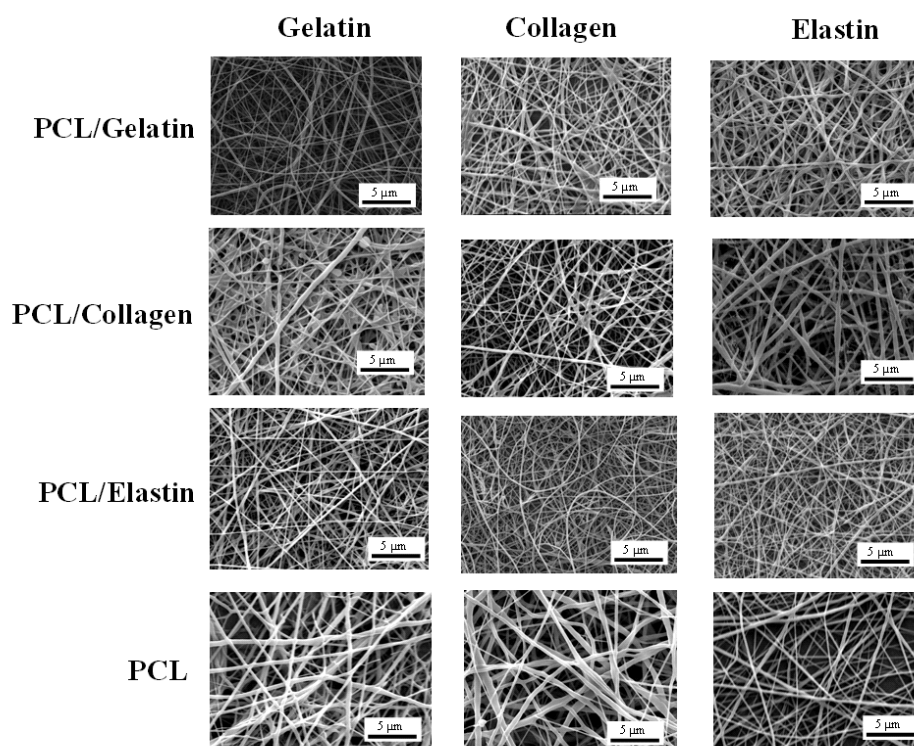

**Fig. S3.** SEM images after protein rebinding of the MI products (PCL-Gelatin, PCL-Collagen, PCL-Elastin and PCL) in different protein solutions (gelatin, collagen and elastin).

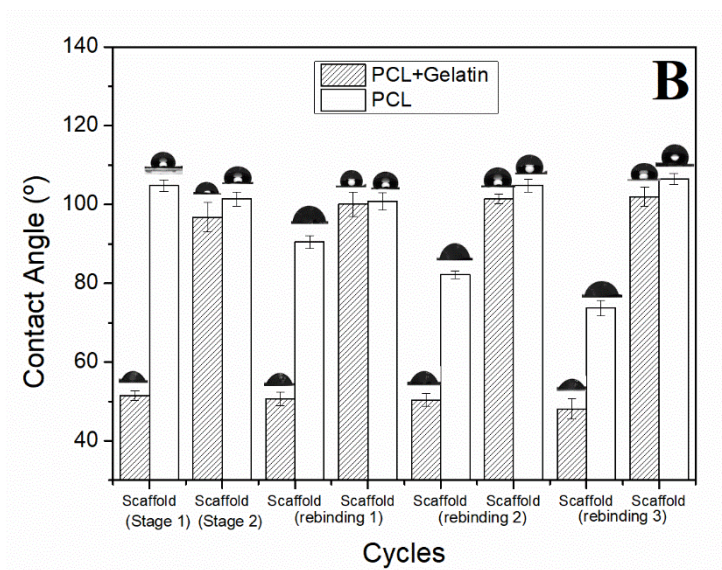

**Fig. S4.** Water contact angle (WCA) measurements obtained for PCL and PCL-Gelatin systems obtained *via* electrospinning (Stage 1) and after the solvent extraction stage after each consecutive rebinding process (rebinding 1, 2 and 3). Images of the drops during the WCA measurements have also been included.

## Tables

**Table S1.** %N content obtained for the PCL-Gelatin and PCL systems after performing each stage of the molecular imprinting process and varying the template rebinding molecule (gelatin, collagen and elastin).

| SYSTEMS     | %N              |                    |                    |             |             |
|-------------|-----------------|--------------------|--------------------|-------------|-------------|
|             | Electrospinning | Solvent Extraction | Template Rebinding |             |             |
|             |                 |                    | Gelatin            | Collagen    | Elastin     |
| PCL/Gelatin | 3.31 ± 0.12     | -                  | 2.83 ± 0.17        | 1.78 ± 0.07 | 0.73 ± 0.04 |
| PCL         | -               | -                  | 1.34 ± 0.16        | 1.50 ± 0.06 | 0.49 ± 0.02 |

**Table S2.** Mean fiber diameter (nm) and uniformity (%) before and after protein rebinding of the MI products (PCL-Gelatin, PCL-Collagen, PCL-Elastin and PCL) in different protein solutions (gelatin, collagen and elastin).

| SYSTEMS      | Mean Fiber Diameter (nm) |           |           |           |           |           | Uniformity (%) |       |          |       |         |       |
|--------------|--------------------------|-----------|-----------|-----------|-----------|-----------|----------------|-------|----------|-------|---------|-------|
|              | GELATIN                  |           | COLLAGEN  |           | ELASTIN   |           | GELATIN        |       | COLLAGEN |       | ELASTIN |       |
|              | Before                   | After     | Before    | After     | Before    | After     | Before         | After | Before   | After | Before  | After |
| PCL/Gelatin  | 298 ± 89                 | 258 ± 92  | 288 ± 89  | 307 ± 74  | 298 ± 89  | 323 ± 73  | 71.01          | 69.10 | 71.01    | 75.89 | 71.01   | 77.40 |
| PCL/Collagen | 294 ± 123                | 330 ± 104 | 294 ± 123 | 372 ± 126 | 294 ± 123 | 364 ± 147 | 58.16          | 68.48 | 58.16    | 66.13 | 58.16   | 59.62 |
| PCL/Elastin  | 150 ± 69                 | 202 ± 58  | 150 ± 69  | 211 ± 76  | 150 ± 69  | 209 ± 88  | 58.39          | 71.28 | 58.39    | 63.98 | 58.39   | 57.89 |
| PCL          | 441 ± 112                | 419 ± 90  | 441 ± 112 | 424 ± 81  | 441 ± 112 | 481 ± 118 | 74.60          | 78.52 | 75.16    | 80.90 | 75.16   | 75.47 |

**Table S3.** %N content obtained for the PCL-Gelatin and PCL systems obtained *via* electrospinning after performing the rebinding stage of the MI process varying the pH of the solution (3, 6 and 9), the immersion time (1, 2 and 4h) and the template solution concentration (0.5, 0.05, 0.005 and 0.0005 %).

| SYSTEMS     | %N                       |             |             |                |             |             |                        |             |             |             |
|-------------|--------------------------|-------------|-------------|----------------|-------------|-------------|------------------------|-------------|-------------|-------------|
|             | Template Rebinding Stage |             |             |                |             |             |                        |             |             |             |
|             | pH                       |             |             | Immersion time |             |             | Solution Concentration |             |             |             |
|             | pH 3                     | pH 6        | pH 9        | 1 h            | 2 h         | 4 h         | 0.5%                   | 0.05%       | 0.005%      | 0.0005%     |
| PCL/Gelatin | 2.83 ± 0.17              | 1.64 ± 0.24 | 1.54 ± 0.21 | 1.91 ± 0.11    | 2.83 ± 0.17 | 3.44 ± 0.05 | 2.83 ± 0.17            | 2.47 ± 0.13 | 1.38 ± 0.06 | 0.44 ± 0.16 |
| PCL         | 1.34 ± 0.16              | 0.80 ± 0.10 | 0.26 ± 0.04 | 0.29 ± 0.08    | 1.34 ± 0.16 | 1.29 ± 0.09 | 1.34 ± 0.16            | 0.62 ± 0.12 | 0.23 ± 0.07 | 0.11 ± 0.10 |

**Table S4.** %N content obtained for the PCL-Gelatin and PCL systems after performing each stage of the molecular imprinting process and varying the number of consecutive cycles performed: One cycle (C1), two cycles (C2) or three cycles (C3).

| SYSTEMS     | %N          |             |             |
|-------------|-------------|-------------|-------------|
|             | Cycles      |             |             |
|             | C1          | C2          | C3          |
| PCL/Gelatin | 2.83 ± 0.17 | 3.05 ± 0.28 | 3.65 ± 0.35 |
| PCL         | 1.34 ± 0.16 | 1.93 ± 0.12 | 2.12 ± 0.09 |
